# Supplementary material
Source: MDPI journal article supplement (https://www.mdpi.com/2071-1050/13/24/13816)
Supplement: s1 [file s1 › sustainability-1479958-supplementary.pdf]

**Potential human exposure to mercury (Hg) in a chlor-alkali plant impacted zone: Risk  
characterization using updated site assessment data**

Symbat Kismelyeva, Rustem Khalikhan, Aisulu Torezhan, Aiganym Kumisbek, Zhanel  
Akimzhanova, Mert Guney, Ferhat Karaca

**Table S1.** Exposure parameters and their deterministic values for inhalation pathway used to  
assess exposure to Hg

|                         |                                                                                        | <b>Scenario for Inhalation Pathway</b>                                 |                                                     |                                                                                 |                                      |
|-------------------------|----------------------------------------------------------------------------------------|------------------------------------------------------------------------|-----------------------------------------------------|---------------------------------------------------------------------------------|--------------------------------------|
|                         |                                                                                        | <b>Value</b>                                                           |                                                     |                                                                                 |                                      |
|                         | <b>Parameter</b>                                                                       | <b>Chronic</b>                                                         |                                                     | <b>Sub-chronic</b>                                                              |                                      |
|                         |                                                                                        | Residential<br>Exposure                                                | Fishing                                             | Recreational<br>Activities                                                      | Soil contact-<br>intensive work      |
| <b>EC<sub>inh</sub></b> | Exposure<br>Concentration from<br>Air Inhalation<br>( $\mu\text{g}/\text{m}^3$ )       | to be determined                                                       | to be determined                                    | to be determined                                                                | to be determined                     |
| <b>CA</b>               | Contaminant<br>Concentration in Air<br>( $\mu\text{g}/\text{m}^3$ )                    | Hg concentrations<br>(Table 6)                                         | Hg<br>concentrations<br>(Table 6)                   | Hg concentrations<br>(Table 6)                                                  | Hg concentrations<br>(Table 6)       |
| <b>ET</b>               | Exposure Time<br>(hours/day)                                                           | 24                                                                     | 8                                                   | 5                                                                               | 8                                    |
| <b>EF</b>               | Exposure Frequency<br>(days/year for<br>chronic, days/week<br>for sub-chronic)         | 350                                                                    | 180                                                 | 1                                                                               | 5                                    |
| <b>ED</b>               | Exposure Duration<br>(years for chronic,<br>weeks for sub-<br>chronic)                 | 6 for children, 70<br>(lifetime), 30<br>(90th), 9 (50th)<br>for adults | 70 (lifetime), 30<br>(90th), 9 (50th)<br>for adults | 156 for children,<br>1820 (lifetime),<br>780 (90th), 234<br>(50th) for children | 780 (90th), 234<br>(50th) for adults |
| <b>AT</b>               | Averaging Time<br>(hours/exposure<br>period for chronic,<br>hours for sub-<br>chronic) | 365*24*ED                                                              | 365*24*ED                                           | 24*7*ED                                                                         | 24*7*ED                              |

**Table S2.** Exposure parameters and their deterministic values for soil ingestion pathway used to assess exposure to Hg

| Scenario for Soil and Dust Ingestion Pathway |                                                           |                                                                                                                 |                                                       |                                                                                                                 |                                                       |
|----------------------------------------------|-----------------------------------------------------------|-----------------------------------------------------------------------------------------------------------------|-------------------------------------------------------|-----------------------------------------------------------------------------------------------------------------|-------------------------------------------------------|
| Parameter                                    |                                                           | Value                                                                                                           |                                                       |                                                                                                                 |                                                       |
|                                              |                                                           | CAP-affected zone                                                                                               |                                                       | Urban zone                                                                                                      |                                                       |
|                                              |                                                           | Recreational Activities                                                                                         | Fishing                                               | Residential Exposure                                                                                            | Soil contact-intensive work                           |
| <b>CDI<sub>ing</sub></b>                     | CDI from Soil Ingestion (mg/kg*day)                       | to be determined                                                                                                | to be determined                                      | to be determined                                                                                                | to be determined                                      |
| <b>CS</b>                                    | Soil Concentration (mg/kg)                                | Hg concentrations (Table 6)                                                                                     | Hg concentrations (Table 6)                           | Hg concentrations (Table 6)                                                                                     | Hg concentrations (Table 6)                           |
| <b>IR</b>                                    | Ingestion Rate (mg soil / day)                            | 59 (50th), 72 (90th) for children; 16 (50th), 20 (90th) for adults                                              | 30 (50th), 100 (90th) for adults                      | 60 (50th), 200 (90th) for children; 30 (50th), 100 (90th) for adults                                            | 30 (50th), 100 (90th) for adults                      |
| <b>CF</b>                                    | Conversion Factor (kg/mg)                                 | 10 <sup>-6</sup>                                                                                                | 10 <sup>-6</sup>                                      | 10 <sup>-6</sup>                                                                                                | 10 <sup>-6</sup>                                      |
| <b>FI</b>                                    | Fraction Ingested from the Contaminated Source (unitless) | 1                                                                                                               | 1                                                     | 1                                                                                                               | 1                                                     |
| <b>EF</b>                                    | Exposure Frequency (days/year)                            | 26                                                                                                              | 90                                                    | 180                                                                                                             | 130                                                   |
| <b>ED</b>                                    | Exposure Duration (years)                                 | 9 (50th), 30 (90th), 70 (lifetime)                                                                              | 9 (50th), 30 (90th), 70 (lifetime)                    | 9 (50th), 30 (90th), 70 (lifetime)                                                                              | 9 (50th), 30 (90th)                                   |
| <b>BW</b>                                    | Body Weight (kg)                                          | 17.5kg (50th), 19.7kg (75th), 23.2kg (90th) for children, 77.9kg (50th), 92.4kg (75th), 107kg (90th) for adults | 77.9kg (50th), 92.4kg (75th), 107kg (90th) for adults | 17.5kg (50th), 19.7kg (75th), 23.2kg (90th) for children, 77.9kg (50th), 92.4kg (75th), 107kg (90th) for adults | 77.9kg (50th), 92.4kg (75th), 107kg (90th) for adults |
| <b>AT</b>                                    | Averaging Time (days)                                     | 365*ED                                                                                                          | 365*ED                                                | 365*ED                                                                                                          | 365*ED                                                |

**Table S3.** Exposure parameters and their deterministic values for water ingestion pathway used to assess exposure to Hg

| Scenario for Water Ingestion Pathway |                                        |                                                                                                                 |                                                        |
|--------------------------------------|----------------------------------------|-----------------------------------------------------------------------------------------------------------------|--------------------------------------------------------|
| Parameter                            |                                        | Value                                                                                                           |                                                        |
|                                      |                                        | CAP-affected zone                                                                                               |                                                        |
|                                      |                                        | Recreational Activities                                                                                         | Fishing                                                |
| <b>CDI<sub>wing</sub></b>            | CDI from Water Ingestion (mg/kg*day)   | to be determined                                                                                                | to be determined                                       |
| <b>C<sub>w</sub></b>                 | Chemical Concentration in water (mg/L) | Hg concentrations (Table 6)                                                                                     | Hg concentrations (Table 6)                            |
| <b>CR</b>                            | Contact Rate (L/hr)                    | 0.103 (90th), 0.048 (75th), 0.029 (50th) for children; 0.050 (90th), 0.029 (75th), 0.013 (50th) for adults      | 0.0108 (90th), 0.0108 (75th), 0.0036 (50th) for adults |
| <b>ET</b>                            | Exposure Time (hr/event)               | 2                                                                                                               | 8                                                      |
| <b>EF</b>                            | Exposure Frequency (events/year)       | 40                                                                                                              | 180                                                    |
| <b>ED</b>                            | Exposure Duration (years)              | 6 for children; 70 (lifetime), 30 (90th), 9 (50th) for adults                                                   | 70 (lifetime), 30 (90th), 9 (50th) for adults          |
| <b>BW</b>                            | Body Weight (kg)                       | 17.5kg (50th), 19.7kg (75th), 23.2kg (90th) for children, 77.9kg (50th), 92.4kg (75th), 107kg (90th) for adults | 77.9kg (50th), 92.4kg (75th), 107kg (90th) for adults  |
| <b>AT</b>                            | Averaging Time (days)                  | 365*ED                                                                                                          | 365*ED                                                 |

**Table S4.** Exposure parameters and their deterministic values for water dermal contact pathway used to assess exposure to Hg

| Scenario for Water Dermal Contact Pathway |                                                                           |                                                                                                                 |                                                       |
|-------------------------------------------|---------------------------------------------------------------------------|-----------------------------------------------------------------------------------------------------------------|-------------------------------------------------------|
| Parameter                                 |                                                                           | Value                                                                                                           |                                                       |
|                                           |                                                                           | CAP-affected zone                                                                                               |                                                       |
|                                           |                                                                           | Recreational Activities                                                                                         | Fishing                                               |
| <b>DAD<sub>swder</sub></b>                | Dermally Absorbed Dose from Dermal Contact with Surface Water (mg/kg*day) | to be determined                                                                                                | to be determined                                      |
| <b>DA<sub>event</sub></b>                 | Absorbed Dose per Event ((mg/cm <sup>2</sup> )/event)                     | to be determined                                                                                                | to be determined                                      |
| <b>K<sub>p</sub></b>                      | Dermal Permeability of a Compound in Water (cm/hr)                        | 0.001                                                                                                           | 0.001                                                 |
| <b>C<sub>w</sub></b>                      | Chemical Concentration in Water (mg/cm <sup>3</sup> )                     | Hg concentrations (Table 6)                                                                                     | Hg concentrations (Table 6)                           |
| <b>t<sub>event</sub></b>                  | Event Duration (hours/event)                                              | 8                                                                                                               | 8                                                     |
| <b>EV</b>                                 | Event Frequency (events/day)                                              | 1                                                                                                               | 1                                                     |
| <b>ED</b>                                 | Exposure Duration (years)                                                 | 70 (lifetime), 30 (90th), 9 (50th) for children; 70 (lifetime), 30 (90th), 9 (50th) for adults                  | 70 (lifetime), 30 (90th), 9 (50th) for adults         |
| <b>EF</b>                                 | Exposure Frequency (events/year)                                          | 40                                                                                                              | 180                                                   |
| <b>SA</b>                                 | Skin Surface Area Available for Contact (cm <sup>2</sup> )                | 7400 (50th), 8000 (75th), 8800 (90th) for children, 77.9kg (50th), 92.4kg (75th), 107kg (90th) for adults       | 19500 (50th), 21600 (75th), 23100 (90th) for adults   |
| <b>BW</b>                                 | Body Weight (kg)                                                          | 17.5kg (50th), 19.7kg (75th), 23.2kg (90th) for children, 77.9kg (50th), 92.4kg (75th), 107kg (90th) for adults | 77.9kg (50th), 92.4kg (75th), 107kg (90th) for adults |
| <b>AT</b>                                 | Averaging Time (days)                                                     | 365*ED                                                                                                          | 365*ED                                                |

**Table S5.** Daily intake values from deterministic exposure assessment of adults to Hg-contaminated soils for inhalation, dermal, and ingestion pathways under different exposure scenarios

| Scenario          |                             | Percentile                        |                          |                          |                          |                                         |                          |                          |                          |                                               |                          |                          |                          |
|-------------------|-----------------------------|-----------------------------------|--------------------------|--------------------------|--------------------------|-----------------------------------------|--------------------------|--------------------------|--------------------------|-----------------------------------------------|--------------------------|--------------------------|--------------------------|
|                   |                             | Normal exposure, 50 <sup>th</sup> |                          |                          |                          | Conservative exposure, 75 <sup>th</sup> |                          |                          |                          | Maximum reasonable exposure, 90 <sup>th</sup> |                          |                          |                          |
|                   |                             | CDI <sub>ing</sub>                | CDI <sub>wing</sub>      | EC                       | DAD                      | CDI <sub>ing</sub>                      | CDI <sub>wing</sub>      | EC                       | DAD                      | CDI <sub>ing</sub>                            | CDI <sub>wing</sub>      | EC                       | DAD                      |
| CAP-affected zone | Recreational Activities     | 4.47<br>$\times 10^{-9}$          | 1.08<br>$\times 10^{-8}$ | 2.68<br>$\times 10^{-4}$ | 4.06<br>$\times 10^{-9}$ | 3.52<br>$\times 10^{-8}$                | 5.31<br>$\times 10^{-9}$ | 4.46<br>$\times 10^{-4}$ | 9.89<br>$\times 10^{-9}$ | 1.05<br>$\times 10^{-7}$                      | 2.47<br>$\times 10^{-8}$ | 7.74<br>$\times 10^{-4}$ | 2.46<br>$\times 10^{-8}$ |
|                   | Fishing                     | 5.38<br>$\times 10^{-8}$          | 7.69<br>$\times 10^{-9}$ | 4.93<br>$\times 10^{-3}$ | 7.59<br>$\times 10^{-9}$ | 2.73<br>$\times 10^{-6}$                | 5.24<br>$\times 10^{-8}$ | 8.22<br>$\times 10^{-3}$ | 1.72<br>$\times 10^{-8}$ | 3.53<br>$\times 10^{-6}$                      | 2.89<br>$\times 10^{-7}$ | 1.42<br>$\times 10^{-2}$ | 4.07<br>$\times 10^{-8}$ |
| Urban zone        | Residential Exposure        | 2.18<br>$\times 10^{-9}$          |                          | 3.84<br>$\times 10^{-3}$ |                          | 1.10<br>$\times 10^{-8}$                |                          | 4.79<br>$\times 10^{-3}$ |                          | 1.32<br>$\times 10^{-7}$                      |                          | 5.75<br>$\times 10^{-3}$ |                          |
|                   | Soil contact-intensive work | 1.58<br>$\times 10^{-8}$          |                          | 9.52<br>$\times 10^{-4}$ |                          | 7.94<br>$\times 10^{-8}$                |                          | 1.19<br>$\times 10^{-3}$ |                          | 1.23<br>$\times 10^{-7}$                      |                          | 1.43<br>$\times 10^{-3}$ |                          |

**Table S6.** Daily intake values from deterministic exposure assessment of children to Hg-contaminated soils for inhalation, dermal, and ingestion pathways under different exposure scenarios

| Scenario                 |                         | Percentile                        |                       |                       |                       |                                         |                       |                       |                       |                                               |                       |                       |                       |
|--------------------------|-------------------------|-----------------------------------|-----------------------|-----------------------|-----------------------|-----------------------------------------|-----------------------|-----------------------|-----------------------|-----------------------------------------------|-----------------------|-----------------------|-----------------------|
|                          |                         | Normal exposure, 50 <sup>th</sup> |                       |                       |                       | Conservative exposure, 75 <sup>th</sup> |                       |                       |                       | Maximum reasonable exposure, 90 <sup>th</sup> |                       |                       |                       |
|                          |                         | CDI <sub>ing</sub>                | CDI <sub>wing</sub>   | EC                    | DAD                   | CDI <sub>ing</sub>                      | CDI <sub>wing</sub>   | EC                    | DAD                   | CDI <sub>ing</sub>                            | CDI <sub>wing</sub>   | EC                    | DAD                   |
| <b>CAP-affected zone</b> | Recreational Activities | $7.33 \times 10^{-8}$             | $1.06 \times 10^{-9}$ | $2.68 \times 10^{-4}$ | $6.74 \times 10^{-9}$ | $5.95 \times 10^{-7}$                   | $4.00 \times 10^{-8}$ | $4.46 \times 10^{-4}$ | $1.67 \times 10^{-8}$ | $1.74 \times 10^{-6}$                         | $1.99 \times 10^{-7}$ | $7.74 \times 10^{-4}$ | $4.25 \times 10^{-8}$ |
| <b>Urban zone</b>        | Residential Exposure    | $1.91 \times 10^{-8}$             |                       | $3.84 \times 10^{-3}$ |                       | $1.00 \times 10^{-7}$                   |                       | $4.79 \times 10^{-3}$ |                       | $1.20 \times 10^{-6}$                         |                       | $5.75 \times 10^{-3}$ |                       |

**Table S7.** Daily intake parameter values from probabilistic exposure assessment of adults to Hg-contaminated soils for inhalation, dermal, and ingestion pathways under different exposure scenarios

| Scenario          |                             | Percentile                        |                           |                          |                           |                                         |                           |                          |                           |                                               |                           |                          |                          |
|-------------------|-----------------------------|-----------------------------------|---------------------------|--------------------------|---------------------------|-----------------------------------------|---------------------------|--------------------------|---------------------------|-----------------------------------------------|---------------------------|--------------------------|--------------------------|
|                   |                             | Normal exposure, 50 <sup>th</sup> |                           |                          |                           | Conservative exposure, 75 <sup>th</sup> |                           |                          |                           | Maximum reasonable exposure, 90 <sup>th</sup> |                           |                          |                          |
|                   |                             | CDI <sub>ing</sub>                | CDI <sub>wing</sub>       | EC                       | DAD                       | CDI <sub>ing</sub>                      | CDI <sub>wing</sub>       | EC                       | DAD                       | CDI <sub>ing</sub>                            | CDI <sub>wing</sub>       | EC                       | DAD                      |
| CAP-affected zone | Recreational Activities     | 1.88<br>$\times 10^{-8}$          | 2.12<br>$\times 10^{-11}$ | 1.46<br>$\times 10^{-4}$ | 4.44<br>$\times 10^{-10}$ | 4.92<br>$\times 10^{-8}$                | 5.40<br>$\times 10^{-11}$ | 2.22<br>$\times 10^{-4}$ | 9.06<br>$\times 10^{-10}$ | 1.13<br>$\times 10^{-7}$                      | 1.26<br>$\times 10^{-10}$ | 3.21<br>$\times 10^{-4}$ | 1.70<br>$\times 10^{-9}$ |
|                   | Fishing                     | 3.00<br>$\times 10^{-7}$          | 5.69<br>$\times 10^{-9}$  | 1.70<br>$\times 10^{-3}$ | 1.74<br>$\times 10^{-8}$  | 9.94<br>$\times 10^{-7}$                | 1.42<br>$\times 10^{-8}$  | 2.51<br>$\times 10^{-3}$ | 3.33<br>$\times 10^{-8}$  | 3.12<br>$\times 10^{-6}$                      | 3.40<br>$\times 10^{-8}$  | 3.57<br>$\times 10^{-3}$ | 5.95<br>$\times 10^{-8}$ |
| Urban zone        | Residential Exposure        | 8.43<br>$\times 10^{-10}$         |                           | 3.72<br>$\times 10^{-3}$ |                           | 2.27<br>$\times 10^{-9}$                |                           | 4.95<br>$\times 10^{-3}$ |                           | 5.46<br>$\times 10^{-9}$                      |                           | 6.45<br>$\times 10^{-3}$ |                          |
|                   | Soil contact-intensive work | 5.28<br>$\times 10^{-9}$          |                           | 9.00<br>$\times 10^{-4}$ |                           | 1.84<br>$\times 10^{-8}$                |                           | 1.25<br>$\times 10^{-3}$ |                           | 5.54<br>$\times 10^{-8}$                      |                           | 1.69<br>$\times 10^{-3}$ |                          |

**Table S8.** Daily intake parameter values from probabilistic exposure assessment of children to Hg-contaminated soils for inhalation, dermal, and ingestion pathways under different exposure scenarios

| Scenario                 |                         | Percentile                        |                        |                       |                        |                                         |                        |                       |                       |                                               |                        |                       |                       |
|--------------------------|-------------------------|-----------------------------------|------------------------|-----------------------|------------------------|-----------------------------------------|------------------------|-----------------------|-----------------------|-----------------------------------------------|------------------------|-----------------------|-----------------------|
|                          |                         | Normal exposure, 50 <sup>th</sup> |                        |                       |                        | Conservative exposure, 75 <sup>th</sup> |                        |                       |                       | Maximum reasonable exposure, 90 <sup>th</sup> |                        |                       |                       |
|                          |                         | CDI <sub>ing</sub>                | CDI <sub>wing</sub>    | EC                    | DAD                    | CDI <sub>ing</sub>                      | CDI <sub>wing</sub>    | EC                    | DAD                   | CDI <sub>ing</sub>                            | CDI <sub>wing</sub>    | EC                    | DAD                   |
| <b>CAP-affected zone</b> | Recreational Activities | $2.99 \times 10^{-7}$             | $9.45 \times 10^{-11}$ | $1.46 \times 10^{-4}$ | $7.50 \times 10^{-10}$ | $7.74 \times 10^{-7}$                   | $2.39 \times 10^{-10}$ | $2.22 \times 10^{-4}$ | $1.53 \times 10^{-9}$ | $1.85 \times 10^{-6}$                         | $5.43 \times 10^{-10}$ | $3.21 \times 10^{-4}$ | $2.84 \times 10^{-9}$ |
| <b>Urban zone</b>        | Residential Exposure    | $1.31 \times 10^{-8}$             |                        | $3.72 \times 10^{-3}$ |                        | $3.48 \times 10^{-8}$                   |                        | $4.95 \times 10^{-3}$ |                       | $8.49 \times 10^{-8}$                         |                        | $6.45 \times 10^{-3}$ |                       |
